# Supplementary material for: Characterization of Immune-Related Long Non-coding RNAs to Construct a Novel Signature and Predict the Prognosis and Immune Landscape of Soft Tissue Sarcoma
Source: Front Cell Dev Biol. 2021 Sep 24;9:709241. doi: 10.3389/fcell.2021.709241 (PMC8497898; doi:10.3389/fcell.2021.709241)
Supplement: Supplementary file 1 [file Table_1.XLSX]

## Sheet: Sheet1
Sample list from TCGA-SARC and GTEx
TCGA-SARC	TCGA-FX-A2QS-11A-11R-A21T-07	TCGA-K1-A3PO-11A-12R-A21T-07	TCGA-X6-A7W8-01A-21R-A355-07	TCGA-RN-AAAQ-01A-21R-A39D-07	TCGA-DX-AB3B-01A-11R-A41I-07	TCGA-DX-A1KZ-01A-11R-A24X-07	TCGA-DX-AB2Z-01A-11R-A38C-07	TCGA-DX-AB3A-01A-11R-A41I-07	TCGA-DX-A8BH-01A-11R-A37L-07	TCGA-DX-A7ES-01A-31R-A39D-07	TCGA-3B-A9I1-01A-11R-A39D-07	TCGA-QC-A7B5-01A-11R-A33J-07	TCGA-DX-A8BM-01A-11R-A41I-07	TCGA-3B-A9HZ-01A-11R-A39D-07	TCGA-DX-A6YS-01A-12R-A355-07	TCGA-DX-A1L0-01A-11R-A24X-07	TCGA-DX-AB2J-01A-11R-A38C-07	TCGA-3B-A9I0-01A-11R-A39D-07	TCGA-3B-A9HR-01A-11R-A38C-07	TCGA-3B-A9HS-01A-11R-A39D-07	TCGA-DX-A48P-01A-11R-A30C-07	TCGA-MJ-A68H-01A-11R-A30C-07	TCGA-K1-A3PN-01A-11R-A22K-07	TCGA-K1-A6RU-01A-11R-A32Q-07	TCGA-DX-A3U7-01A-11R-A29R-07	TCGA-Z4-A9VC-01A-11R-A37L-07	TCGA-K1-A3PO-01A-11R-A21T-07	TCGA-DX-A6BG-01A-11R-A30C-07	TCGA-DX-A6Z0-01A-13R-A36F-07	TCGA-DX-A3UB-01A-11R-A30C-07	TCGA-K1-A42W-01A-11R-A24X-07	TCGA-DX-A6B9-01A-12R-A32Q-07	TCGA-DX-A3LY-01B-11R-A27Q-07	TCGA-DX-A3UC-01A-11R-A30C-07	TCGA-FX-A3NJ-01A-11R-A21T-07	TCGA-MO-A47P-01A-11R-A24X-07	TCGA-DX-A23V-01A-11R-A29R-07	TCGA-DX-A8BJ-01A-11R-A41I-07	TCGA-3B-A9HI-01A-11R-A38C-07	TCGA-DX-A6BA-01A-11R-A30C-07	TCGA-DX-A6BB-01A-12R-A32Q-07	TCGA-DX-A23T-01A-11R-A26T-07	TCGA-DX-AB2F-01A-11R-A38C-07	TCGA-X2-A95T-01A-11R-A37L-07	TCGA-DX-A48O-01A-11R-A30C-07	TCGA-QQ-A8VD-01A-42R-A39D-07	TCGA-IF-A4AJ-01A-11R-A24X-07	TCGA-DX-A3UF-01A-11R-A30C-07	TCGA-IW-A3M6-01A-11R-A21T-07
GTEx
ID	body site detail	primary site	gender
GTEX-XGQ4-1026-SM-4AT4L	Adipose - Visceral (Omentum)	Adipose Tissue	male
GTEX-XMK1-0926-SM-4B66X	Adipose - Visceral (Omentum)	Adipose Tissue	male
GTEX-XOT4-0826-SM-4B66Y	Adipose - Visceral (Omentum)	Adipose Tissue	female
GTEX-XQ3S-2426-SM-4WAYB	Adipose - Visceral (Omentum)	Adipose Tissue	male
GTEX-XQ8I-1426-SM-4BOPW	Adipose - Visceral (Omentum)	Adipose Tissue	male
GTEX-XUJ4-1726-SM-4BONW	Adipose - Visceral (Omentum)	Adipose Tissue	female
GTEX-XUZC-1126-SM-4BOPZ	Adipose - Visceral (Omentum)	Adipose Tissue	female
GTEX-XV7Q-1726-SM-4BRUU	Adipose - Visceral (Omentum)	Adipose Tissue	female
GTEX-XXEK-1426-SM-4BRW1	Adipose - Visceral (Omentum)	Adipose Tissue	male
GTEX-XYKS-1826-SM-4E3JV	Adipose - Visceral (Omentum)	Adipose Tissue	female
GTEX-Y111-0926-SM-4SOIU	Adipose - Visceral (Omentum)	Adipose Tissue	male
GTEX-Y114-1326-SM-4TT9A	Adipose - Visceral (Omentum)	Adipose Tissue	female
GTEX-Y3I4-0726-SM-4TT7M	Adipose - Visceral (Omentum)	Adipose Tissue	male
GTEX-Y5LM-0826-SM-4VDSW	Adipose - Visceral (Omentum)	Adipose Tissue	female
GTEX-Y5V5-0226-SM-5S2N8	Adipose - Visceral (Omentum)	Adipose Tissue	female
GTEX-Y8E4-1226-SM-5IFIM	Adipose - Visceral (Omentum)	Adipose Tissue	male
GTEX-Y8LW-0926-SM-4VBQ8	Adipose - Visceral (Omentum)	Adipose Tissue	female
GTEX-YEC3-0926-SM-5Q5AC	Adipose - Visceral (Omentum)	Adipose Tissue	male
GTEX-YEC4-0926-SM-5PNXY	Adipose - Visceral (Omentum)	Adipose Tissue	male
GTEX-YECK-1426-SM-5IFHE	Adipose - Visceral (Omentum)	Adipose Tissue	male
GTEX-YJ89-1926-SM-5IFJ6	Adipose - Visceral (Omentum)	Adipose Tissue	male
GTEX-Z9EW-0826-SM-5HL9T	Adipose - Visceral (Omentum)	Adipose Tissue	male
GTEX-ZA64-0926-SM-5HL7H	Adipose - Visceral (Omentum)	Adipose Tissue	male
GTEX-ZAB4-1426-SM-5CVN6	Adipose - Visceral (Omentum)	Adipose Tissue	male
GTEX-ZAB5-1126-SM-5Q5AD	Adipose - Visceral (Omentum)	Adipose Tissue	male
GTEX-ZAJG-1626-SM-5HL7I	Adipose - Visceral (Omentum)	Adipose Tissue	female
GTEX-ZC5H-1626-SM-5HL7L	Adipose - Visceral (Omentum)	Adipose Tissue	female
GTEX-ZDTS-1826-SM-5S2N6	Adipose - Visceral (Omentum)	Adipose Tissue	male
GTEX-ZDTT-0526-SM-5HL4M	Adipose - Visceral (Omentum)	Adipose Tissue	male
GTEX-ZDXO-2326-SM-5LU9W	Adipose - Visceral (Omentum)	Adipose Tissue	male
GTEX-ZDYS-2226-SM-5S2MI	Adipose - Visceral (Omentum)	Adipose Tissue	male
GTEX-ZE7O-1526-SM-5J1NH	Adipose - Visceral (Omentum)	Adipose Tissue	female
GTEX-ZE9C-1326-SM-5S2OW	Adipose - Visceral (Omentum)	Adipose Tissue	male
GTEX-XGQ4-2226-SM-4AT4Y	Adipose - Subcutaneous	Adipose Tissue	male
GTEX-XK95-0426-SM-4AT4R	Adipose - Subcutaneous	Adipose Tissue	male
GTEX-XLM4-0226-SM-4AT4N	Adipose - Subcutaneous	Adipose Tissue	male
GTEX-XMD2-0226-SM-4WWEE	Adipose - Subcutaneous	Adipose Tissue	female
GTEX-XMK1-2226-SM-4B673	Adipose - Subcutaneous	Adipose Tissue	male
GTEX-XOTO-0226-SM-4B66H	Adipose - Subcutaneous	Adipose Tissue	male
GTEX-XPVG-2726-SM-4B66W	Adipose - Subcutaneous	Adipose Tissue	male
GTEX-XQ3S-1626-SM-4WAYN	Adipose - Subcutaneous	Adipose Tissue	male
GTEX-XQ8I-0526-SM-4BOPS	Adipose - Subcutaneous	Adipose Tissue	male
GTEX-XUYS-0226-SM-47JX1	Adipose - Subcutaneous	Adipose Tissue	male
GTEX-XUZC-1826-SM-4BRVO	Adipose - Subcutaneous	Adipose Tissue	female
GTEX-XV7Q-2626-SM-4BRVA	Adipose - Subcutaneous	Adipose Tissue	female
GTEX-XXEK-2426-SM-4BRUS	Adipose - Subcutaneous	Adipose Tissue	male
GTEX-XYKS-2726-SM-4E3IC	Adipose - Subcutaneous	Adipose Tissue	female
GTEX-Y111-0226-SM-4SOIW	Adipose - Subcutaneous	Adipose Tissue	male
GTEX-Y114-2326-SM-4TT7X	Adipose - Subcutaneous	Adipose Tissue	female
GTEX-Y3I4-2226-SM-4TT7O	Adipose - Subcutaneous	Adipose Tissue	male
GTEX-Y3IK-2526-SM-4WWDM	Adipose - Subcutaneous	Adipose Tissue	female
GTEX-Y5V5-2426-SM-5IFJA	Adipose - Subcutaneous	Adipose Tissue	female
GTEX-Y5V6-2526-SM-5IFJV	Adipose - Subcutaneous	Adipose Tissue	male
GTEX-Y8E4-0726-SM-4WWFN	Adipose - Subcutaneous	Adipose Tissue	male
GTEX-Y8E5-0226-SM-57WCM	Adipose - Subcutaneous	Adipose Tissue	male
GTEX-Y8LW-1926-SM-4WWFZ	Adipose - Subcutaneous	Adipose Tissue	female
GTEX-YB5E-2126-SM-5IFI7	Adipose - Subcutaneous	Adipose Tissue	male
GTEX-YB5K-2226-SM-4WWG1	Adipose - Subcutaneous	Adipose Tissue	female
GTEX-YEC3-1226-SM-5IFI8	Adipose - Subcutaneous	Adipose Tissue	male
GTEX-YEC4-2426-SM-57WFO	Adipose - Subcutaneous	Adipose Tissue	male
GTEX-YECK-0226-SM-4W215	Adipose - Subcutaneous	Adipose Tissue	male
GTEX-YF7O-2426-SM-5IFJL	Adipose - Subcutaneous	Adipose Tissue	male
GTEX-YFC4-0226-SM-57WD2	Adipose - Subcutaneous	Adipose Tissue	female
GTEX-YFCO-2026-SM-4W21Q	Adipose - Subcutaneous	Adipose Tissue	male
GTEX-YJ8A-0526-SM-5IFHT	Adipose - Subcutaneous	Adipose Tissue	male
GTEX-YJ8O-2426-SM-5HL7S	Adipose - Subcutaneous	Adipose Tissue	female
GTEX-Z93S-0226-SM-5HL7R	Adipose - Subcutaneous	Adipose Tissue	male
GTEX-Z93T-0226-SM-5HL5Z	Adipose - Subcutaneous	Adipose Tissue	male
GTEX-ZAJG-0226-SM-5HL81	Adipose - Subcutaneous	Adipose Tissue	female
GTEX-ZAK1-0226-SM-5CVMX	Adipose - Subcutaneous	Adipose Tissue	female
GTEX-ZC5H-0126-SM-4WAYL	Adipose - Subcutaneous	Adipose Tissue	female
GTEX-ZDTS-0226-SM-5HL7Q	Adipose - Subcutaneous	Adipose Tissue	male
GTEX-ZDXO-2426-SM-5S2NJ	Adipose - Subcutaneous	Adipose Tissue	male
GTEX-ZDYS-2126-SM-5S2OD	Adipose - Subcutaneous	Adipose Tissue	male
GTEX-ZE7O-0226-SM-5S2N1	Adipose - Subcutaneous	Adipose Tissue	female
GTEX-ZE9C-2826-SM-5S2MO	Adipose - Subcutaneous	Adipose Tissue	male
[truncated: 212 more columns]
